# Supplementary material
Source: PubMed Central journal article supplement (PMC4724042)

## SUPPLEMENTARY DATA

**Figure S1.** Hypothetical phylogenetic relationships among 64 plant species used in phylogenetically informed meta-analyses.

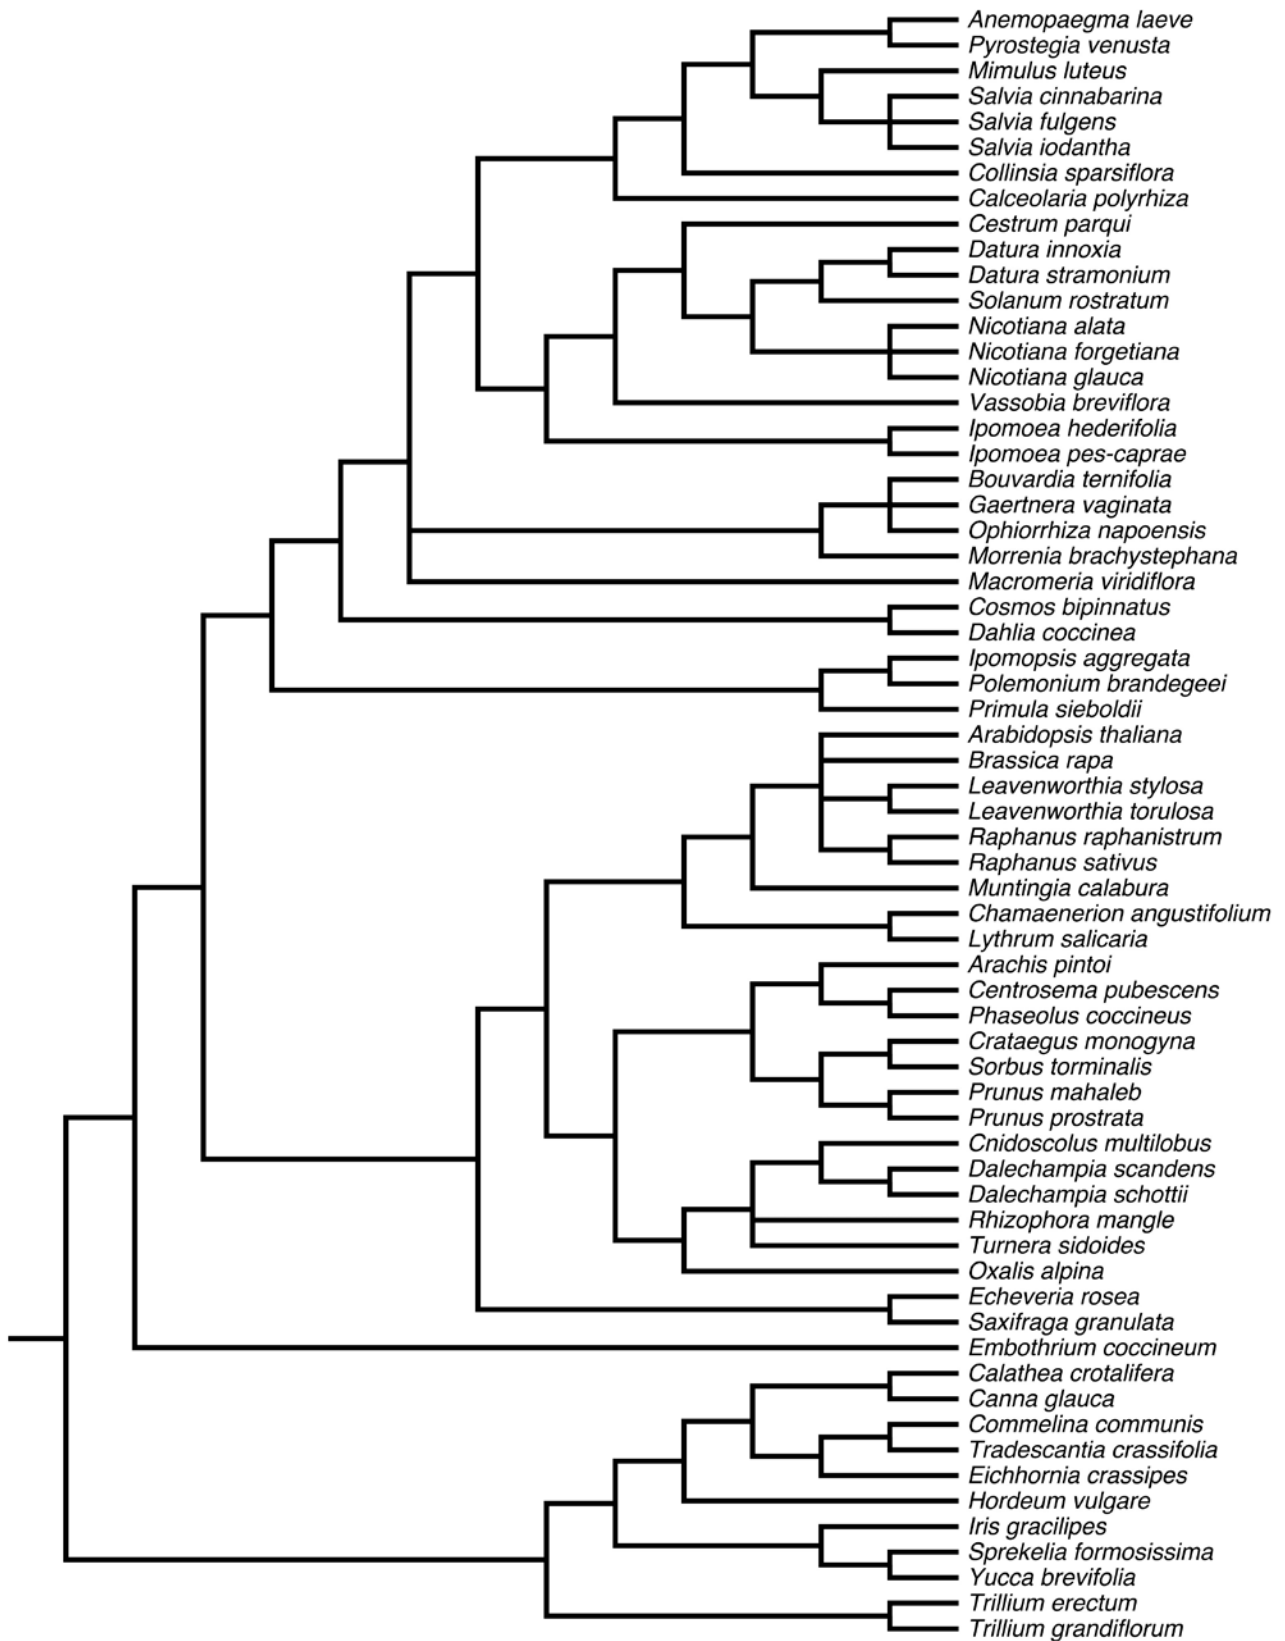

**Figure S2.** Spearman rank correlation between effect sizes and sample sizes. The absence of a significant correlation ( $r = 0.194$ ,  $P = 0.125$ ) indicate low chances of publication bias.

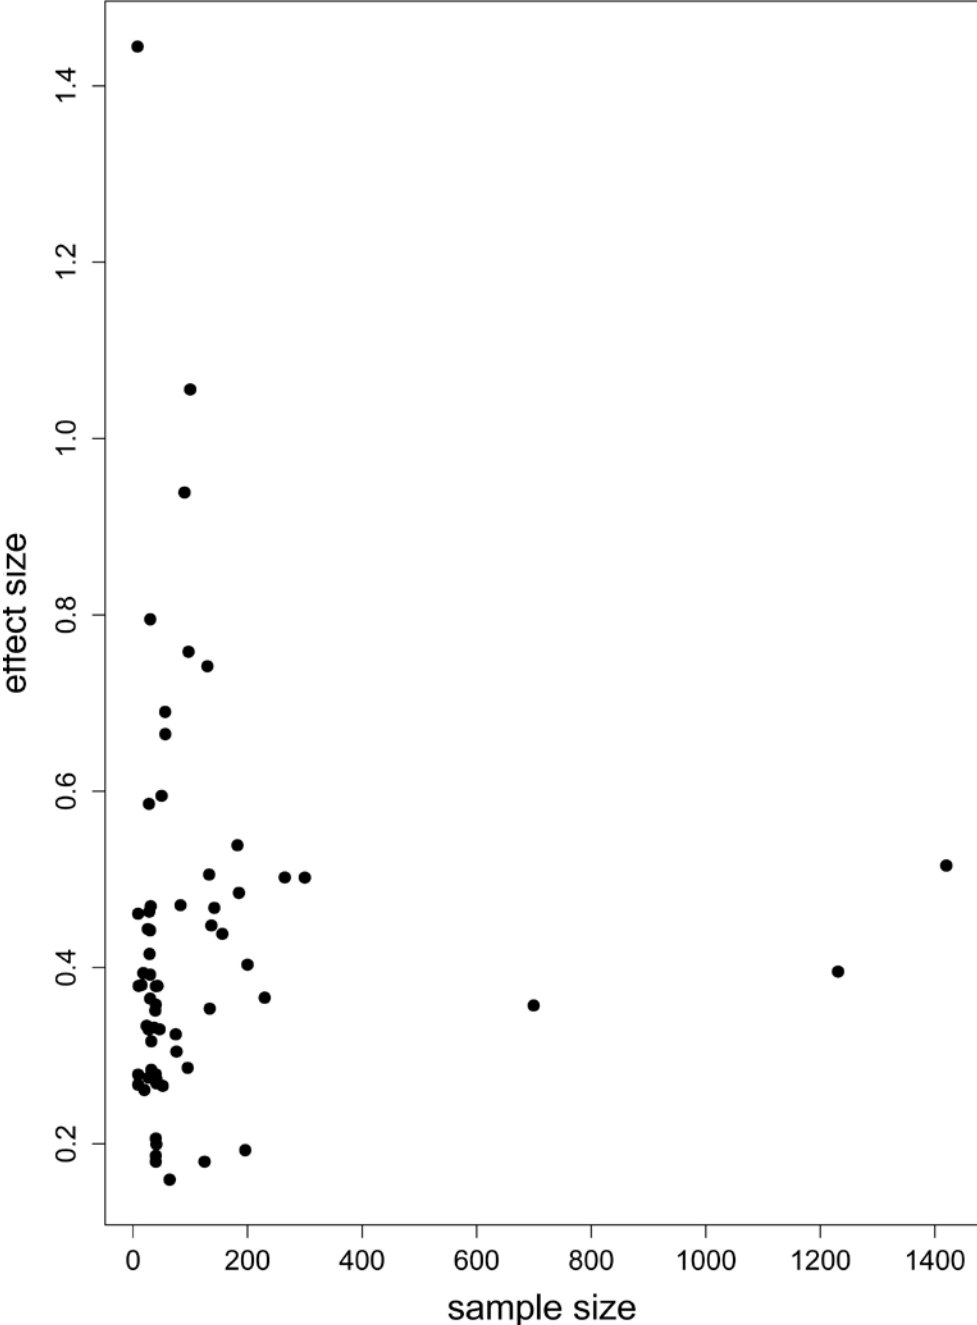

Supplement: supp_mcv166_aob-15608-s01.pdf [file supp_mcv166_aob-15608-s01.pdf]
